# Supplementary material for: Highly dispersed Cu(ii), Co(ii) and Ni(ii) catalysts covalently immobilized on imine-modified silica for cyclohexane oxidation with hydrogen peroxide
Source: Royal Society of Chemistry journal article supplement (doi:10.1039/c4ra01960a), 2014-01-01
Supplement: c4ra01960a1.pdf [file c4ra01960a1.pdf]

## **Electronic supplementary information**

### **Highly dispersed Cu(II), Co(II) and Ni(II) catalysts covalently immobilized on imine modified silica for cyclohexane oxidation with hydrogen peroxide**

R. Antony<sup>a</sup>, S. Theodore David Manickam<sup>a,\*</sup>, Pratap Kollu<sup>b</sup>, P.V. Chandrasekar<sup>c</sup>,

K. Karuppasamy<sup>a</sup>, S. Balakumar<sup>a</sup>

<sup>1</sup>Centre for Scientific and Applied Research, PSN College of Engineering and Technology,  
Tirunelveli-627 152, Tamil Nadu, India.

<sup>2</sup>Department of Metallurgical Engineering and Materials Science, Indian Institute of  
Technology, Mumbai-400076, India.

<sup>3</sup>College of Physics and Information Engineering, Institute of Optoelectronic Display, Fuzhou  
University, Fuzhou-350002, PR China.

#### **Table of contents**

1. EDS spectrum of silica gel (Fig. S1)
2. EDS spectrum of amino modified silica gel, SiO<sub>2</sub>-NH<sub>2</sub> (Fig. S2)
3. EDS spectrum of imine modified silica gel, L (Fig. S3)
4. EDS spectrum of Cu(II) catalyst (1) (Fig. S4)
5. EDS spectrum of Co(II) catalyst (2) (Fig. S5)
6. EDS spectrum of Ni(II) catalyst (3) (Fig. S6)
7. UV-Vis. spectrum of silica gel (Fig. S7)
8. UV-Vis. spectrum of amino modified silica gel, SiO<sub>2</sub>-NH<sub>2</sub> (Fig. S8)
9. SEM image of silica gel (Fig. S9)
10. Thermal decomposition steps of silica gel, L and catalysts *viz* 1, 2 and 3 (Table S1)

### EDS analysis of Silica gel

#### Net Counts

| <i>O</i> | <i>Si</i> |
|----------|-----------|
| 19873    | 98836     |

#### Weight %

| <i>O</i> | <i>Si</i> |
|----------|-----------|
| 41.90    | 58.10     |

#### Atom %

| <i>O</i> | <i>Si</i> |
|----------|-----------|
| 55.87    | 44.13     |

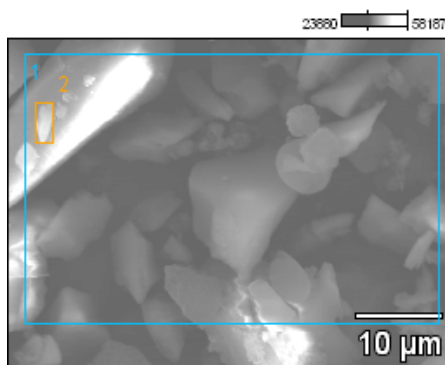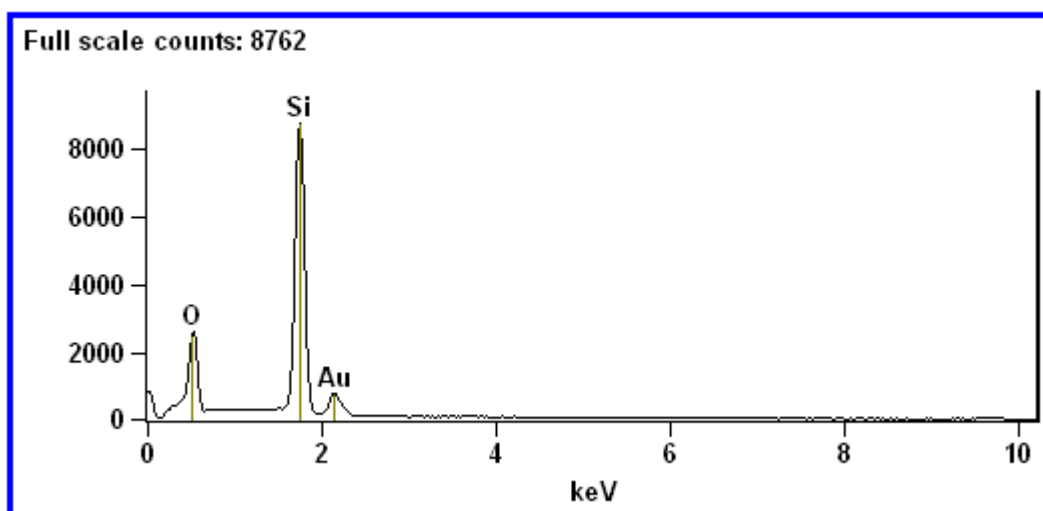

Fig. S1 EDS spectrum of silica gel

## EDS analysis of amino modified silica gel

### Net Counts

| <i>C</i> | <i>N</i> | <i>O</i> | <i>Si</i> |
|----------|----------|----------|-----------|
| 3040     | 3005     | 19453    | 72307     |

### Weight %

| <i>C</i> | <i>N</i> | <i>O</i> | <i>Si</i> |
|----------|----------|----------|-----------|
| 11.10    | 12.06    | 42.04    | 34.81     |

### Atom %

| <i>C</i> | <i>N</i> | <i>O</i> | <i>Si</i> |
|----------|----------|----------|-----------|
| 16.35    | 15.23    | 46.49    | 21.93     |

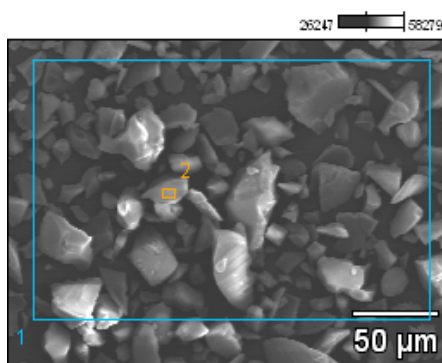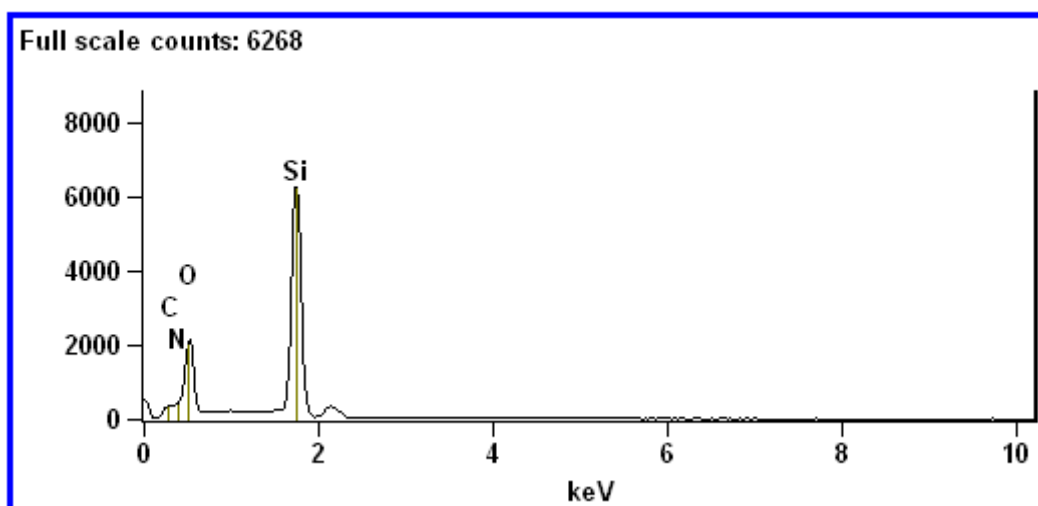

**Fig. S2** EDS spectrum of amino modified silica gel, SiO<sub>2</sub>-NH<sub>2</sub>

## EDS analysis of imine modified silica gel, L

### Net Counts

| <i>C</i> | <i>N</i> | <i>O</i> | <i>Si</i> |
|----------|----------|----------|-----------|
| 3360     | 1770     | 13351    | 49000     |

### Weight %

| <i>C</i> | <i>N</i> | <i>O</i> | <i>Si</i> |
|----------|----------|----------|-----------|
| 15.92    | 10.74    | 40.93    | 32.41     |

### Atom %

| <i>C</i> | <i>N</i> | <i>O</i> | <i>Si</i> |
|----------|----------|----------|-----------|
| 22.83    | 13.21    | 44.07    | 19.88     |

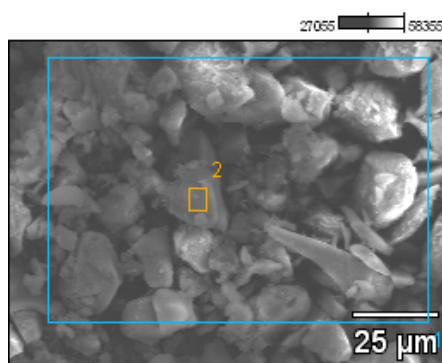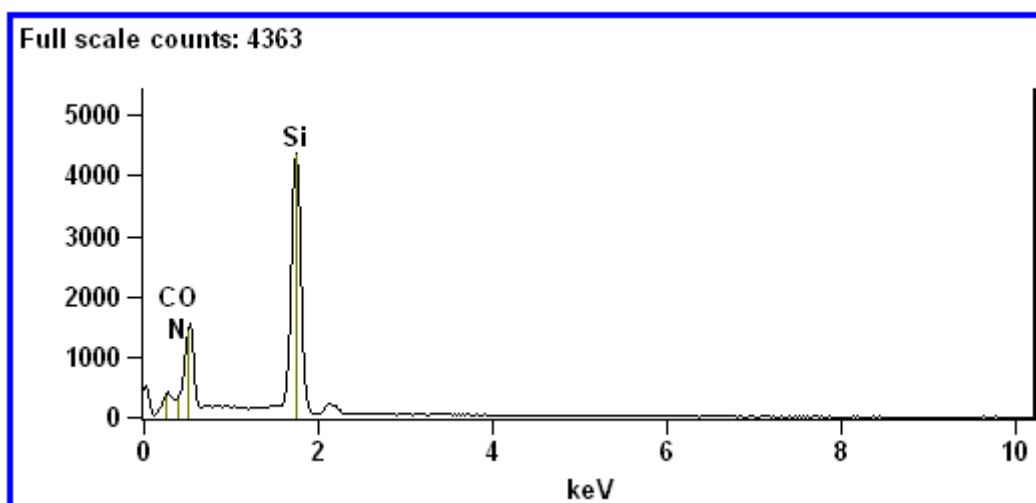

Fig. S3 EDS spectrum of imine modified silica gel, L

### EDS analysis of Cu(II) catalyst (catalyst 1)

#### Net Counts

| <i>C</i> | <i>N</i> | <i>O</i> | <i>Si</i> | <i>Cu</i> | <i>Cl</i> |
|----------|----------|----------|-----------|-----------|-----------|
| 3754     | 2082     | 14756    | 50505     | 292       | 271       |

#### Weight %

| <i>C</i> | <i>N</i> | <i>O</i> | <i>Si</i> | <i>Cu</i> | <i>Cl</i> |
|----------|----------|----------|-----------|-----------|-----------|
| 15.60    | 11.11    | 39.51    | 29.63     | 2.21      | 1.94      |

#### Atom %

| <i>C</i> | <i>N</i> | <i>O</i> | <i>Si</i> | <i>Cu</i> | <i>Cl</i> |
|----------|----------|----------|-----------|-----------|-----------|
| 22.60    | 13.81    | 43.75    | 18.68     | 0.60      | 0.55      |

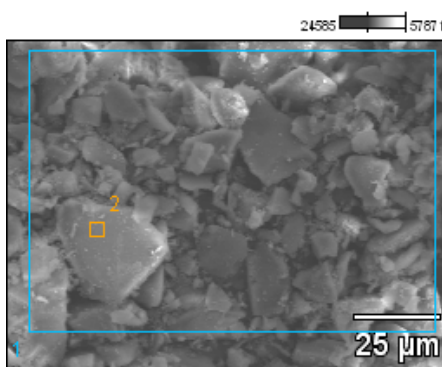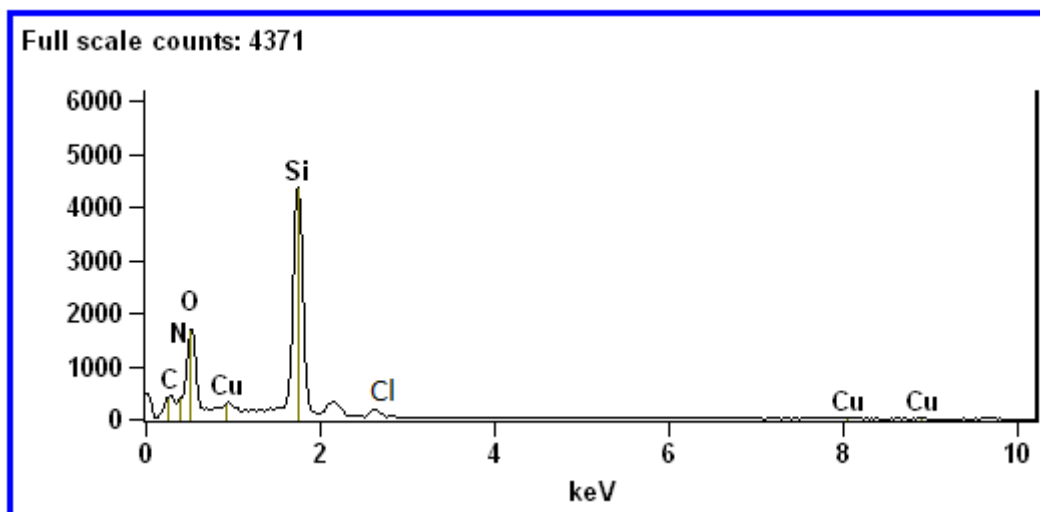

Fig. S4 EDS spectrum of Cu(II) catalyst (1)

### EDS analysis of Co(II) catalyst (catalyst 2)

#### Net Counts

| <i>C</i> | <i>N</i> | <i>O</i> | <i>Si</i> | <i>Co</i> | <i>Cl</i> |
|----------|----------|----------|-----------|-----------|-----------|
| 5818     | 3001     | 21999    | 69330     | 342       | 318       |

#### Weight %

| <i>C</i> | <i>N</i> | <i>O</i> | <i>Si</i> | <i>Co</i> | <i>Cl</i> |
|----------|----------|----------|-----------|-----------|-----------|
| 16.30    | 11.19    | 41.80    | 28.68     | 1.06      | 0.97      |

#### Atom %

| <i>C</i> | <i>N</i> | <i>O</i> | <i>Si</i> | <i>Co</i> | <i>Cl</i> |
|----------|----------|----------|-----------|-----------|-----------|
| 23.18    | 13.64    | 44.99    | 17.62     | 0.31      | 0.26      |

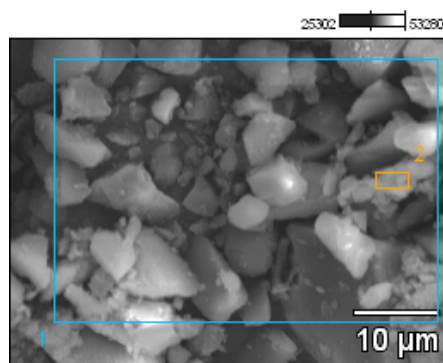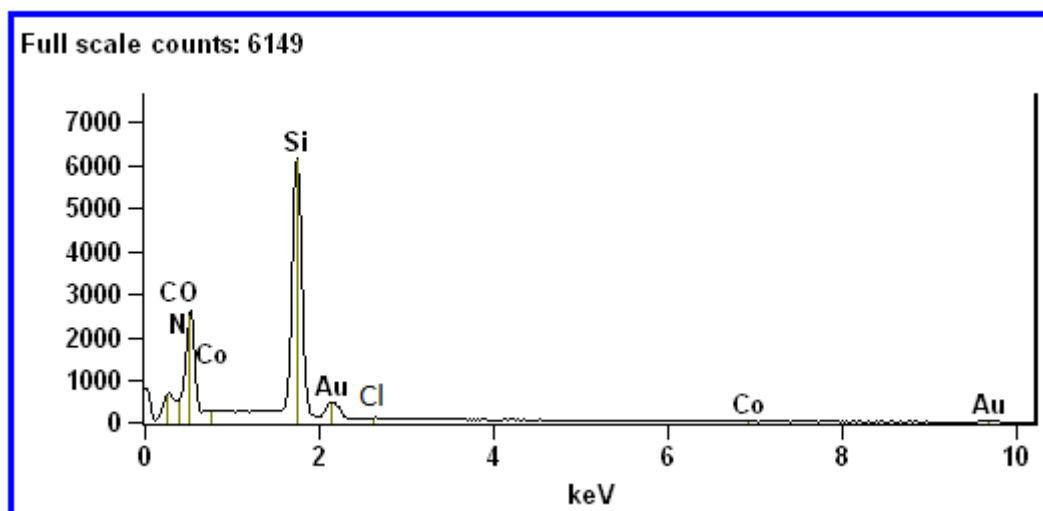

Fig. S5 EDS spectrum of Co(II) catalyst (2)

### EDS analysis of Ni catalyst (catalyst 3)

#### Net Counts

| <i>C</i> | <i>N</i> | <i>O</i> | <i>Si</i> | <i>Ni</i> | <i>Cl</i> |
|----------|----------|----------|-----------|-----------|-----------|
| 6629     | 2813     | 21804    | 80450     | 230       | 208       |

#### Weight %

| <i>C</i> | <i>N</i> | <i>O</i> | <i>Si</i> | <i>Ni</i> | <i>Cl</i> |
|----------|----------|----------|-----------|-----------|-----------|
| 17.92    | 10.40    | 39.47    | 30.64     | 0.81      | 0.76      |

#### Atom %

| <i>C</i> | <i>N</i> | <i>O</i> | <i>Si</i> | <i>Ni</i> | <i>Cl</i> |
|----------|----------|----------|-----------|-----------|-----------|
| 25.53    | 12.70    | 42.54    | 18.79     | 0.24      | 0.20      |

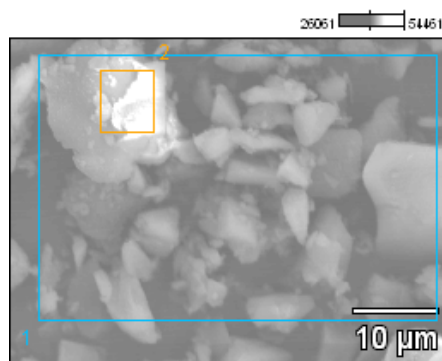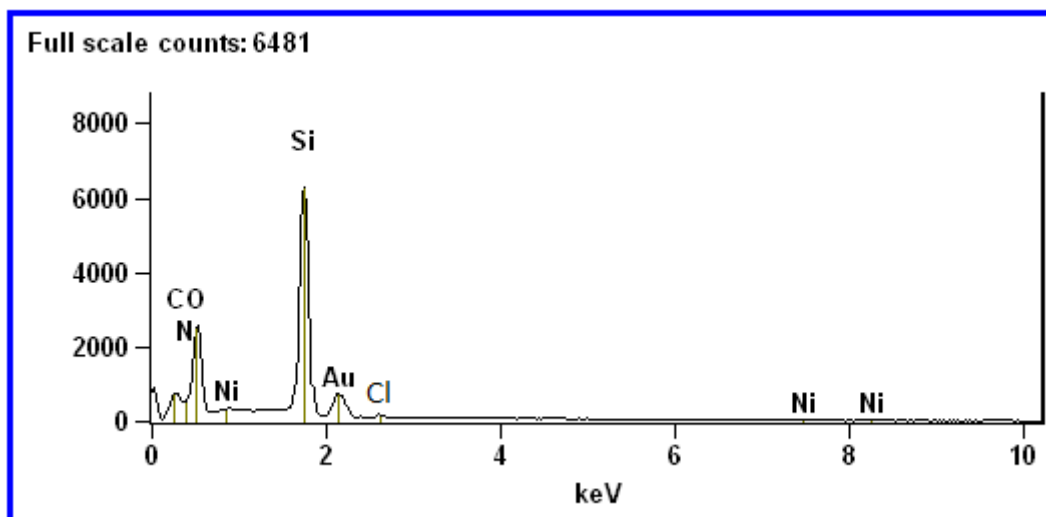

**Fig. S6** EDS spectrum of Ni(II) catalyst (3)

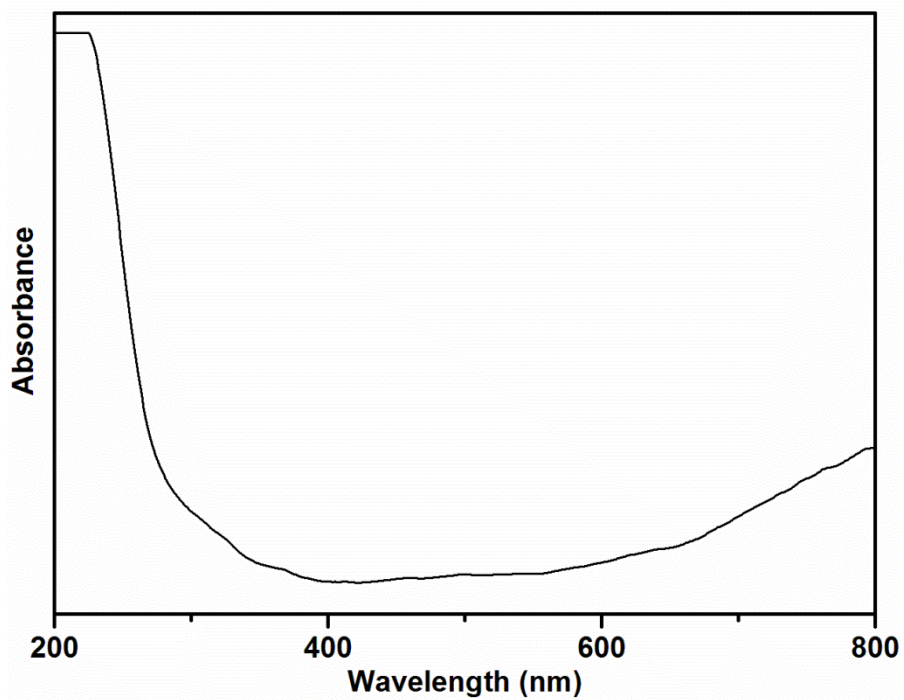

**Fig. S7** UV-Vis. spectrum of silica gel

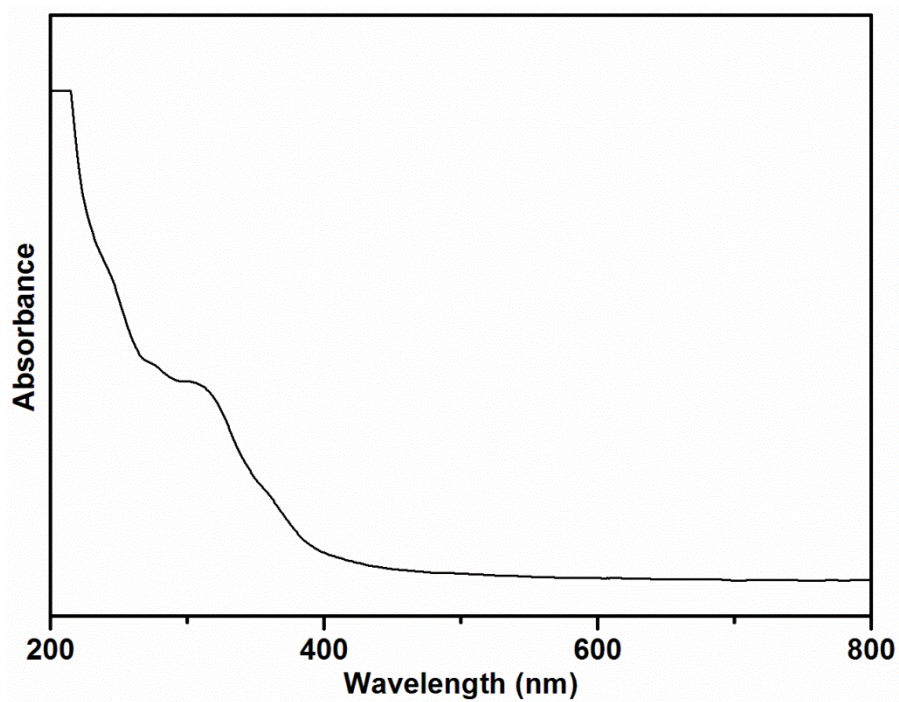

**Fig. S8** UV-Vis. spectrum of amino modified silica gel, SiO<sub>2</sub>-NH<sub>2</sub>



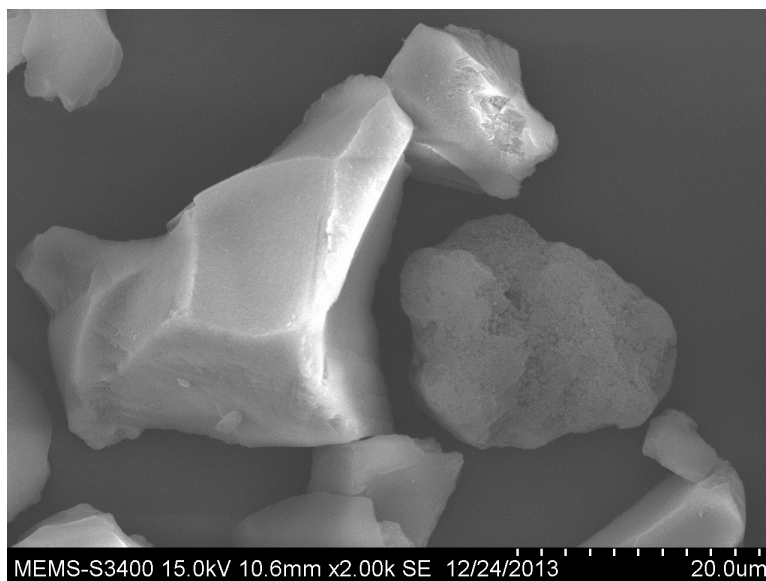

**Fig. S9** SEM image of silica gel

**Table S1** Thermal decomposition steps of silica gel, L and catalysts *viz* 1, 2 and 3

| Compound   | 1 <sup>st</sup> stage, °C<br>(wt loss, %) | 2 <sup>nd</sup> stage, °C<br>(wt loss, %) | 3 <sup>rd</sup> stage, °C<br>(wt loss, %) | 4 <sup>th</sup> stage, °C<br>(wt gain, %) |
|------------|-------------------------------------------|-------------------------------------------|-------------------------------------------|-------------------------------------------|
| L          | 0-110 (~3)                                | 110-370 (~4)                              | 370-800 (~10)                             | -                                         |
| Catalyst 1 | 0-110 (~2)                                | 110-360 (~3)                              | 360-570 (~3)                              | 570-800 (~8)                              |
| Catalyst 2 | 0-110 (~3)                                | 110-340 (~4)                              | 340-570 (~7)                              | 570-800 (~4)                              |
| Catalyst 3 | 0-110 (~2)                                | 110-370 (~4)                              | 370-610 (~5)                              | 610-800 (~3)                              |

1<sup>st</sup> stage: desorption of physically adsorbed water

2<sup>nd</sup> stage: decay of organic moiety

3<sup>rd</sup> stage: dehydroxylation of surface silanol groups

4<sup>th</sup> stage: oxidation reactions
